# Supplementary material for: Effects of rhodioloside on the neurological functions of rats with total cerebral ischemia/reperfusion and cone neuron injury in the hippocampal CA1 region
Source: PeerJ. 2020 Nov 9;8:e10056. doi: 10.7717/peerj.10056 (PMC7659626; doi:10.7717/peerj.10056)
Supplement: Supplemental Information 2 [file peerj-08-10056-s002.xlsx]

## Sheet: table 1
	6h	24h	72h	5days
SO	3.07	2.63	1.82	1.29
	4.84	4.1	2.73	1.87
	1.57	1.76	1.45	0.83
I/R	33.27	29.2	23.07	19.73
	37.75	33.04	26.08	21.57
	29.99	26.26	20.36	17.2
LDP	31.45	21.32	15.62	12.06
	27.57	25.85	18.42	13.92
	35.03	17.84	13.45	10.53
HDP	30.37	18.2	11.37	9.57
	35	20	13.98	11.09
	26.64	15.8	9.15	8.35

## Sheet: ND
	ND
SO	180.17
	193.05
	170.29
I/R	41.47
	48.3
	35.24
LDP	58.18
	65.86
	50.95
HDP	70.22
	80.1
	61.21

## Sheet: apoptotic rate
	apoptotic rate
SO	2.18
	2.44
	1.95
I/R	21.5
	24.18
	18.92
LDP	16.29
	18.65
	13.97
HDP	13.32
	14.76
	11.91

## Sheet: western blot grey value
	p53	β-actin （p53）	Bcl-2	Bax
SO	3942.13	18342.4	6867.46	27963.2
	4443.85	17915.3	7966.25	27519.2
	3404.57	17498.6	5768.67	26927.2
I/R	17581.4	21773.5	8923.61	14228.6
	18219.9	21279.9	11394.8	13778.6
	16942.8	20801.5	6315.17	13178.6
LDP	12482.4	17721.6	3428.75	4493.71
	14042.7	17287.9	4154.84	4076.3
	11788.9	17000.5	2904.35	3531.47
HDP	10106.6	19818.7	10280.9	4432.42
	11350.5	19386.3	10600.9	4038.59
	8940.45	19102.3	9800.87	3530.05
